# Supplementary material
Source: PubMed Central journal article supplement (PMC4845789)
Supplement: supp_ciw110_ciw110supp.pdf [file supp_ciw110_ciw110supp.pdf]

## SUPPLEMENTAL DATA

### TABLES

**Supplemental Table 1.** Baseline Demographics, Clinical Features, and Outcomes of Entire

Cohort

| Characteristic/Outcome                          | N = 190     |
|-------------------------------------------------|-------------|
| <b>Demographics</b>                             |             |
| Age (years), mean (SD)                          | 63.4 (16.4) |
| Female gender, n (%)                            | 103 (54.2)  |
| Race                                            |             |
| African American, n (%)                         | 147 (77.4)  |
| Caucasian, n (%)                                | 25 (13.2)   |
| Hispanic/Latino, n (%)                          | 3 (1.6)     |
| Other, n (%)                                    | 15 (7.9)    |
| <b>Comorbidities &amp; Past Medical History</b> |             |
| Prior hospitalization (1 year), n (%)           | 140 (73.7)  |
| Prior surgery (30 days), n (%)                  | 67 (35.3)   |
| VRE infection (1 year), n (%)                   | 7 (3.7)     |
| IVDU, n (%)                                     | 13 (6.8)    |
| Prosthetic device/hardware, n (%)               | 9 (4.7)     |
| Chronic kidney disease, n (%)                   | 101 (53.2)  |
| Chronic hemodialysis, n (%)                     | 65 (34.2)   |
| Liver disease, n (%)                            | 33 (17.4)   |
| Diabetes mellitus, n (%)                        | 86 (45.3)   |
| Cerebrovascular accident, n (%)                 | 42 (22.1)   |
| Hemi/paraplegia, n (%)                          | 11 (5.8)    |
| HIV/AIDS, n (%)                                 | 9 (4.7)     |
| Immunosuppression (30 days), n (%)              | 22 (11.6)   |
| Bone marrow transplant, n (%)                   | 1 (0.5)     |
| Solid organ transplant, n (%)                   | 1 (0.5)     |
| Chemotherapy/radiation therapy (30 days), n (%) | 18 (9.5)    |
| Urinary catheter <sup>a</sup> , n (%)           | 28 (14.7)   |
| Acute kidney injury <sup>a</sup> , n (%)        | 60 (31.6)   |
| Mechanical ventilation <sup>a</sup> , n (%)     | 34 (17.9)   |

| Characteristic/Outcome                                 | N = 190    |
|--------------------------------------------------------|------------|
| Decubitus ulcer, n (%)                                 | 24 (12.6)  |
| Malignancy, n (%)                                      | 32 (16.8)  |
| Receiving TPN <sup>a</sup> , n (%)                     | 12 (6.3)   |
| Prior antibiotics (90 days), n (%)                     | 86 (45.3)  |
| Charlson comorbidity index <sup>a</sup> , median (IQR) | 7 (5,8)    |
| <b>EBSI Characteristics</b>                            |            |
| Primary source                                         |            |
| Intra-abdominal, n (%)                                 | 30 (15.8)  |
| Infective endocarditis, n (%)                          | 7 (3.7)    |
| IV catheter, n (%)                                     | 94 (49.5)  |
| SSTI, n (%)                                            | 18 (9.5)   |
| Urinary tract, n (%)                                   | 20 (10.5)  |
| Unknown, n (%)                                         | 20 (10.5)  |
| Enterococcal species                                   |            |
| <i>E. faecium</i> , n (%)                              | 89 (46.8)  |
| Polymicrobial BSI, n (%)                               | 84 (44.2)  |
| Intensive care unit <sup>a</sup> , n (%)               | 69 (36.3)  |
| Pitt-bacteremia score <sup>b</sup> , median (IQR)      | 3 (3,5)    |
| Susceptibility phenotypes                              |            |
| Ampicillin resistant, n (%)                            | 87 (45.8)  |
| Vancomycin resistant, n (%)                            | 119 (62.6) |
| Daptomycin non-susceptible, n (%) *N = 124             | 9 (7.3)    |
| Linezolid intermediate, n (%) *N = 110                 | 1 (0.9)    |
| <b>Treatment Data</b>                                  |            |
| Empiric                                                |            |
| Vancomycin, n (%)                                      | 145 (76.3) |
| Linezolid, n (%)                                       | 40 (21.1)  |
| Daptomycin, n (%)                                      | 36 (18.9)  |
| Ampicillin, n (%)                                      | 21 (11.1)  |
| Piperacillin/tazobactam, n (%)                         | 9 (4.7)    |
| Other, n (%)                                           | 8 (4.2)    |
| Definitive                                             |            |
| Vancomycin, n (%)                                      | 32 (16.8)  |
| Linezolid, n (%)                                       | 61 (32.1)  |

| <b>Characteristic/Outcome</b>                     | <b>N = 190</b>    |
|---------------------------------------------------|-------------------|
| Daptomycin, n (%)                                 | 58 (30.5)         |
| Ampicillin, n (%)                                 | 49 (25.8)         |
| Piperacillin/tazobactam, n (%)                    | 12 (6.3)          |
| Other, n (%)                                      | 6 (3.2)           |
| Combination therapy, n (%)                        | 20 (10.5)         |
| Vancomycin trough (mg/dL), mean (SD)              | 19.0 (6.1)        |
| Daptomycin dose (mg/kg), median (IQR)             | 8.9 (7,10)        |
| Time to appropriate therapy (hours), mean (SD)    | 38.6 (30.3)       |
| Time to appropriate therapy (hours), median (IQR) | 31.6 (20.3, 51.2) |
| Time to appropriate therapy $\geq$ 48.1 h, n (%)  | 53 (27.9)         |
| <b>Other treatment information</b>                |                   |
| Source control intervention pursued, n (%)        | 105 (55.3)        |
| ID on consult within 24 h after index, n (%)      | 154 (81.1)        |
| <br><b>Outcomes</b>                               |                   |
| Hospital-los post-EBSI (days), median (IQR)       | 12 (8,18.25)      |
| Duration EB (days), median (IQR)                  | 3 (2,4)           |
| In-hospital mortality, n (%)                      | 37 (19.5)         |
| 30-day mortality, n (%)                           | 44 (23.2)         |

Abbreviations: VRE, vancomycin-resistant enterococci; IVDU, intravenous drug user; HIV, human immunodeficiency virus; AIDS, acquired immune deficiency syndrome; TPN, total parenteral nutrition; LOS, length of stay; EBSI, enterococcal bloodstream infection; BSI, bloodstream infection; ID, infectious diseases

<sup>a</sup> At time of index culture

<sup>b</sup> Worst score in 48 hours preceding index culture

**Supplemental Table 2.** Description of co-pathogens in polymicrobial bloodstream infections

| <b>Co-Pathogen</b>                               | <b>N = 190</b> |
|--------------------------------------------------|----------------|
| Gram-positive                                    | 28 (14.7)      |
| <i>Staphylococcus aureus</i> , n (%)             | 11 (5.8)       |
| Coagulase-negative <i>Staphylococcus</i> , n (%) | 10 (5.3)       |
| <i>Enterococcus spp.</i> , n (%)                 | 8 (4.2)        |
| Gram-negative                                    | 33 (17.4)      |
| <i>Klebsiella spp.</i> , n (%)                   | 9 (4.7)        |
| <i>Acinetobacter baumannii</i> , n (%)           | 8 (4.2)        |
| Other <i>Enterobacteriaceae</i> , n (%)          | 7 (3.7)        |
| <i>Pseudomonas aeruginosa</i> , n (%)            | 5 (2.6)        |
| <i>Escherichia coli</i> , n (%)                  | 5 (2.6)        |
| <i>Stenotrophomonas maltophilia</i> , n (%)      | 2 (1.1)        |
| <i>Bacteroides fragilis</i> , n (%)              | 2 (1.1)        |
| Fungal                                           | 3 (1.6)        |
| <i>Candida albicans</i> , n (%)                  | 2 (1.1)        |
| <i>Candida glabrata</i> , n (%)                  | 2 (1.1)        |

**Supplemental Table 3.** Comparison of Receiver Operating Characteristic Curve Results for CART-derived and *a priori* specified Thresholds in Time to Appropriate Therapy for predicting 30-day Mortality

| <b>Time threshold</b> | <b>Sensitivity (%)</b> | <b>Specificity (%)</b> | <b>Area under ROC curve</b> | <b>95% CI</b> | <b>P value</b> |
|-----------------------|------------------------|------------------------|-----------------------------|---------------|----------------|
| ≥ 24 hours            | 84.1                   | 39.0                   | 0.616                       | 0.527 – 0.705 | 0.020          |
| ≥ 36 hours            | 63.6                   | 64.4                   | 0.640                       | 0.546 – 0.734 | 0.005          |
| ≥ 48.1 hours          | 54.5                   | 80.1                   | 0.673                       | 0.577 – 0.770 | <0.001         |
| ≥ 60 hours            | 36.4                   | 87.0                   | 0.617                       | 0.516 – 0.718 | 0.019          |
| ≥ 72 hours            | 29.5                   | 90.4                   | 0.600                       | 0.498 – 0.702 | 0.045          |

Abbreviations: ROC, receiver-operating characteristic; CI, confidence interval

**Supplemental Table 4.** Bivariate Comparison of 30-day Mortality between Patients Receiving Early or Delayed Appropriate Antibiotic Therapy in Select Subgroups

| Subgroup                               | 30-day mortality, n/N (%) |           | P value |
|----------------------------------------|---------------------------|-----------|---------|
|                                        | Early                     | Delayed   |         |
| <b>Severity of Illness</b>             |                           |           |         |
| Non-intensive care unit                | 10 (11.2)                 | 12 (37.5) | 0.001   |
| Intensive care unit                    | 10 (20.8)                 | 12 (57.1) | 0.003   |
| Pitt bacteremia score < 4 <sup>a</sup> | 2 (4.5)                   | 18 (24.0) | 0.005   |
| Pitt bacteremia score ≥ 4 <sup>a</sup> | 5 (25.0)                  | 19 (37.3) | 0.409   |
| <b>Species</b>                         |                           |           |         |
| <i>Enterococcus faecalis</i>           | 8 (10.5)                  | 12 (48.0) | <0.001  |
| <i>Enterococcus faecium</i>            | 12 (19.7)                 | 12 (42.9) | 0.022   |
| <b>Phenotype</b>                       |                           |           |         |
| Vancomycin-susceptible                 | 7 (11.3)                  | 7 (77.8)  | <0.001  |
| Vancomycin-resistant                   | 13 (17.3)                 | 17 (38.6) | 0.010   |

Abbreviations: VRE, vancomycin-resistant enterococci; IVDU, intravenous drug user; HIV, human immunodeficiency virus; AIDS, acquired immune deficiency syndrome; TPN, total parenteral nutrition; LOS, length of stay; EBSI, enterococcal bloodstream infection; BSI, bloodstream infection; ID, infectious diseases

<sup>a</sup> Worst score in 48 hours preceding index culture
